# Supplementary material for: Bias in dissemination of clinical research findings: structured OPEN framework of what, who and why, based on literature review and expert consensus
Source: HighWire-hosted journal article supplement (doi:10.1136/bmjopen-2015-010024), 2016-01-01
Supplement: bmjopen-2015-010024supp1.pdf [file bmjopen-2015-010024supp1.pdf]

Supplemental file 1: List of included articles

1. Egger, M., et al., *Bias in meta-analysis detected by a simple, graphical test*. BMJ, 1997. **315**(7109): p. 629-34.
2. Moher, D., et al., *Improving the quality of reports of meta-analyses of randomised controlled trials: the QUOROM statement. Quality of Reporting of Meta-analyses*. Lancet, 1999. **354**(9193): p. 1896-900.
3. Begg, C.B. and M. Mazumdar, *Operating characteristics of a rank correlation test for publication bias*. Biometrics, 1994. **50**(4): p. 1088-101.
4. Allison, D.B., et al., *Antipsychotic-induced weight gain: a comprehensive research synthesis*. Am J Psychiatry, 1999. **156**(11): p. 1686-96.
5. Lohmueller, K.E., et al., *Meta-analysis of genetic association studies supports a contribution of common variants to susceptibility to common disease*. Nat Genet, 2003. **33**(2): p. 177-82.
6. Easterbrook, P.J., et al., *Publication bias in clinical research*. Lancet, 1991. **337**(8746): p. 867-72.
7. Ioannidis, J.P., et al., *Replication validity of genetic association studies*. Nat Genet, 2001. **29**(3): p. 306-9.
8. K., R. Scherer, and C. Lefebvre, *Identifying relevant studies for systematic reviews*. BMJ, 1994. **309**(6964): p. 1286-91.
9. Lexchin, J., et al., *Pharmaceutical industry sponsorship and research outcome and quality: systematic review*. BMJ, 2003. **326**(7400): p. 1167-70.
10. Duval, S. and R. Tweedie, *Trim and fill: A simple funnel-plot-based method of testing and adjusting for publication bias in meta-analysis*. Biometrics, 2000. **56**(2): p. 455-63.
11. L'Abbe, K.A., A.S. Detsky, and K. O'Rourke, *Meta-analysis in clinical research*. Ann Intern Med, 1987. **107**(2): p. 224-33.
12. Colhoun, H.M., P.M. McKeigue, and G. Davey Smith, *Problems of reporting genetic associations with complex outcomes*. Lancet, 2003. **361**(9360): p. 865-72.
13. Lau, J., J.P. Ioannidis, and C.H. Schmid, *Quantitative synthesis in systematic reviews*. Ann Intern Med, 1997. **127**(9): p. 820-6.
14. Lorenz, M.W., et al., *Prediction of clinical cardiovascular events with carotid intima-media thickness: a systematic review and meta-analysis*. Circulation, 2007. **115**(4): p. 459-67.
15. Bjelakovic, G., et al., *Mortality in randomized trials of antioxidant supplements for primary and secondary prevention: systematic review and meta-analysis*. JAMA, 2007. **297**(8): p. 842-57.
16. Lau, J., et al., *Cumulative meta-analysis of therapeutic trials for myocardial infarction*. N Engl J Med, 1992. **327**(4): p. 248-54.
17. Turner, E.H., et al., *Selective publication of antidepressant trials and its influence on apparent efficacy*. N Engl J Med, 2008. **358**(3): p. 252-60.
18. Dickersin, K., *The existence of publication bias and risk factors for its occurrence*. JAMA, 1990. **263**(10): p. 1385-9.
19. Maggard, M.A., et al., *Meta-analysis: surgical treatment of obesity*. Ann Intern Med, 2005. **142**(7): p. 547-59.
20. Chan, A.W., et al., *Empirical evidence for selective reporting of outcomes in randomized trials: comparison of protocols to published articles*. JAMA, 2004. **291**(20): p. 2457-65.
21. van Tulder, M., et al., *Updated method guidelines for systematic reviews in the cochrane collaboration back review group*. Spine (Phila Pa 1976), 2003. **28**(12): p. 1290-9.
22. Irwig, L., et al., *Guidelines for meta-analyses evaluating diagnostic tests*. Ann Intern Med, 1994. **120**(8): p. 667-76.
23. Egger, M. and G.D. Smith, *Bias in location and selection of studies*. BMJ, 1998. **316**(7124): p. 61-6.
24. Thompson, S.G. and S.J. Sharp, *Explaining heterogeneity in meta-analysis: a comparison of methods*. Stat Med, 1999. **18**(20): p. 2693-708.
25. Selvin, E., et al., *Meta-analysis: glycosylated hemoglobin and cardiovascular disease in diabetes mellitus*. Ann Intern Med, 2004. **141**(6): p. 421-31.
26. Linde, K., et al., *Are the clinical effects of homeopathy placebo effects? A meta-analysis of placebo-controlled trials*. Lancet, 1997. **350**(9081): p. 834-43.
27. Whelton, S.P., et al., *Effect of aerobic exercise on blood pressure: a meta-analysis of randomized, controlled trials*. Ann Intern Med, 2002. **136**(7): p. 493-503.
28. Shaheen, N.J., et al., *Is there publication bias in the reporting of cancer risk in Barrett's esophagus?* Gastroenterology, 2000. **119**(2): p. 333-8.
29. Autier, P. and S. Gandini, *Vitamin D supplementation and total mortality: a meta-analysis of randomized controlled trials*. Arch Intern Med, 2007. **167**(16): p. 1730-7.
30. Aleman, A., et al., *Memory impairment in schizophrenia: a meta-analysis*. Am J Psychiatry, 1999. **156**(9): p. 1358-66.

31. Dickersin, K., Y.I. Min, and C.L. Meinert, *Factors influencing publication of research results. Follow-up of applications submitted to two institutional review boards.* JAMA, 1992. **267**(3): p. 374-8.
32. Kreimer, A.R., et al., *Human papillomavirus types in head and neck squamous cell carcinomas worldwide: a systematic review.* Cancer Epidemiol Biomarkers Prev, 2005. **14**(2): p. 467-75.
33. McAlindon, T.E., et al., *Glucosamine and chondroitin for treatment of osteoarthritis - A systematic quality assessment and meta-analysis.* Jama-Journal of the American Medical Association, 2000. **283**(11): p. 1469-1475.
34. Ioannidis, J.P., et al., *Genetic associations in large versus small studies: an empirical assessment.* Lancet, 2003. **361**(9357): p. 567-71.
35. Papat, S., R. Hubner, and R.S. Houlston, *Systematic review of microsatellite instability and colorectal cancer prognosis.* J Clin Oncol, 2005. **23**(3): p. 609-18.
36. Sterne, J.A. and G. Davey Smith, *Sifting the evidence-what's wrong with significance tests?* BMJ, 2001. **322**(7280): p. 226-31.
37. Faraone, S.V., et al., *Meta-analysis of the association between the 7-repeat allele of the dopamine D(4) receptor gene and attention deficit hyperactivity disorder.* Am J Psychiatry, 2001. **158**(7): p. 1052-7.
38. Stewart, L.A. and M.K. Parmar, *Meta-analysis of the literature or of individual patient data: is there a difference?* Lancet, 1993. **341**(8842): p. 418-22.
39. Sterne, J.A., M. Egger, and G.D. Smith, *Systematic reviews in health care: Investigating and dealing with publication and other biases in meta-analysis.* BMJ, 2001. **323**(7304): p. 101-5.
40. Dwamena, B.A., et al., *Metastases from non-small cell lung cancer: mediastinal staging in the 1990s--meta-analytic comparison of PET and CT.* Radiology, 1999. **213**(2): p. 530-6.
41. Corrao, G., et al., *Alcohol and coronary heart disease: a meta-analysis.* Addiction, 2000. **95**(10): p. 1505-23.
42. Moher, D., et al., *Preferred reporting items for systematic reviews and meta-analyses: the PRISMA Statement.* Open Med, 2009. **3**(3): p. e123-30.
43. Simes, R.J., *Publication bias: the case for an international registry of clinical trials.* J Clin Oncol, 1986. **4**(10): p. 1529-41.
44. Egger, M., et al., *Language bias in randomised controlled trials published in English and German.* Lancet, 1997. **350**(9074): p. 326-9.
45. Sterne, J.A. and M. Egger, *Funnel plots for detecting bias in meta-analysis: guidelines on choice of axis.* J Clin Epidemiol, 2001. **54**(10): p. 1046-55.
46. Kriegeskorte, N., et al., *Circular analysis in systems neuroscience: the dangers of double dipping.* Nat Neurosci, 2009. **12**(5): p. 535-40.
47. Anderson, I.M., *Selective serotonin reuptake inhibitors versus tricyclic antidepressants: a meta-analysis of efficacy and tolerability.* J Affect Disord, 2000. **58**(1): p. 19-36.
48. Nakagawa, S., *A farewell to Bonferroni: the problems of low statistical power and publication bias.* Behavioral Ecology, 2004. **15**(6): p. 1044-1045.
49. Birks, H.J.B., D.G. Frey & E.S. Deevey review #1 - *Numerical tools in palaeolimnology - Progress, potentialities, and problems.* Journal of Paleolimnology, 1998. **20**(4): p. 307-332.
50. Sue Duval, Richard Tweedie. *A Nonparametric "Trim and Fill" Method of Accounting for Publication Bias in Meta-Analysis.* Journal of the American Statistical Association, Vol. 95, No. 449 (Mar., 2000), pp. 89-98
