# Supplementary material for: Bias in dissemination of clinical research findings: structured OPEN framework of what, who and why, based on literature review and expert consensus
Source: HighWire-hosted journal article supplement (doi:10.1136/bmjopen-2015-010024), 2016-01-01
Supplement: bmjopen-2015-010024supp2.pdf [file bmjopen-2015-010024supp2.pdf]

Supplemental file 2: General characteristics of included articles

|                                | Number absolute | Number in percentage |
|--------------------------------|-----------------|----------------------|
| <b>Year of publication</b>     |                 |                      |
| 2005 – 2009                    | 9/50            | 18%                  |
| 2000 – 2004                    | 20/50           | 40%                  |
| 1995 – 1999                    | 11/50           | 22%                  |
| Before 1995                    | 10/50           | 20%                  |
| <b>Language of publication</b> |                 |                      |
| English                        | 50/50           | 100%                 |
| <b>Journal published in</b>    |                 |                      |
| Addiction                      | 1/50            | 2%                   |
| Am J Psychiat                  | 3/50            | 6%                   |
| Ann Intern Med                 | 6/50            | 12%                  |
| Arch Intern Med                | 1/50            | 2%                   |
| Behav Ecol                     | 1/50            | 2%                   |
| Biometrics                     | 2/50            | 4%                   |
| BMJ                            | 6/50            | 12%                  |
| Cancer Epidem Biomar           | 1/50            | 2%                   |
| Circulation                    | 1/50            | 2%                   |
| Gastroenterology               | 1/50            | 2%                   |
| J Affect Disorders             | 1/50            | 2%                   |
| J Clin Epidemiol               | 1/50            | 2%                   |
| J Clin Oncol                   | 2/50            | 4%                   |
| JAMA                           | 5/50            | 10%                  |
| J Paleolimnol                  | 1/50            | 2%                   |

|                 |      |     |
|-----------------|------|-----|
| J Am Stat Assoc | 1/50 | 2%  |
| Lancet          | 7/50 | 14% |
| Nat Genet       | 2/50 | 4%  |
| Nat Neurosci    | 1/50 | 2%  |
| N Engl J Med    | 2/50 | 4%  |
| Open Med        | 1/50 | 2%  |
| Radiology       | 1/50 | 2%  |
| Spine           | 1/50 | 2%  |
| Stat Med        | 1/50 | 2%  |
